# Supplementary material for: A novel crystallographic location of rattling atoms in filled Eu x Co4Sb12 skutterudites prepared under high-pressure conditions
Source: publisher site journal article supplement (doi:10.1515/zkri-2022-0051), 2022-12-12
Supplement: Supplementary file 1 [file j_zkri-2022-0051_suppl.docx]

**SUPPLEMENTARY INFORMATION**

**A novel crystallographic location of rattling atoms in filled Eu*x*Co4Sb12 skutterudites prepared under high-pressure conditions**

J. E. Rodrigues,1,2 J. Gainza,1 F. Serrano-Sánchez,1 N. M. Nemes,3 O. J. Dura,4 J. L. Martínez,1 J. A. Alonso1*

*1Instituto de Ciencia de Materiales de Madrid (ICMM). Consejo Superior de Investigaciones Científicas (CSIC). Sor Juana Inés de la Cruz 3, E-28049, Madrid, Spain.*

2*European Synchrotron Radiation Facility (ESRF), 71 Avenue des Martyrs, 38000 Grenoble, France. 3Departamento de Física de Materiales, Universidad Complutense de Madrid, E-28040 Madrid, Spain. 4Departamento de Física Aplicada, Universidad de Castilla-La Mancha, Ciudad Real, E-13071, Spain.*

***Corresponding author:** [ja.alonso@icmm.csic.es](mailto:ja.alonso@icmm.csic.es)

**Table S1.** Crystallographic parameters for Eu*x*Co4Sb12 prepared under high-pressure conditions,refined from SXRD data at 473 K.

| | *Crystal data* | | --- | | [Cubic](Eu05Co4Sb12_30C%20_symmetry_cell_setting), | | SXRD, λ= 0.45861 Å | | *a* = [9.05127(2)](Eu05Co4Sb12_30C%20_cell_length_a) Å | | *V* = [741.53(1)](Eu05Co4Sb12_30C%20_cell_volume) Å3 | | *Z* = [2](Eu05Co4Sb12_30C%20_cell_formula_units_Z) | |  |  | *Refinement* | | --- | | *R*p = [11.36%](Eu05Co4Sb12_30C%20_pd_proc_ls_prof_R_factor) | | *R*wp = [19.59%](Eu05Co4Sb12_30C%20_pd_proc_ls_prof_wR_factor) | | *R*exp = [5.57%](Eu05Co4Sb12_30C%20_pd_proc_ls_prof_wR_expected) | | *R*Bragg = [2.40%](Eu05Co4Sb12_30C%20_refine_ls_R_I_factor) | | χ2 = 5.39 | |  | |
| --- | --- | --- | --- | --- | --- | --- | --- | --- | --- | --- | --- | --- | --- | --- | --- | --- | --- | --- | --- | --- |

| | [*Fractional atomic coordinates and isotropic or equivalent isotropic displacement parameters (Å2)*](Eu05Co4Sb12_30C%20_atom_site_label) | | | | | | | | --- | --- | --- | --- | --- | --- | --- | |  | *Site* | *x* | *y* | *z* | *U*iso*/*U*eq | Occ. (<1) | | | Co | 8*c* | 1/4 | 1/4 | 1/4 | 0.0085(4) |  | | | Sb | 24*g* | 0 | 0.33483(6) | 0.15793(6) | 0.0107(4) | 0.992(4) | | | Eu | 12*d* | 0.25(3) | 0 | 0 | 0.02533* | 0.0026(12) | |  | [*Atomic displacement parameters (Å2)*](Eu05Co4Sb12_30C%20_atom_site_aniso_label) | | | | | | | | --- | --- | --- | --- | --- | --- | --- | |  | *U*11 | *U*22 | *U*33 | *U*12 | *U*13 | *U*23 | | Co | 0.0085(4) | 0.0085(4) | 0.0085(4) | 0.0003(5) | 0.0003(5) | 0.0003(5) | | Sb | 0.0088(3) | 0.0128(4) | 0.0106(4) | 0.00000 | 0.00000 | 0.0010(3) | |
| --- | --- | --- | --- | --- | --- | --- | --- | --- | --- | --- | --- | --- | --- | --- | --- | --- | --- | --- | --- | --- | --- | --- | --- | --- | --- | --- | --- | --- | --- | --- | --- | --- | --- | --- | --- | --- | --- | --- | --- | --- | --- | --- | --- | --- | --- | --- | --- | --- | --- | --- | --- | --- | --- | --- | --- | --- | --- | --- | --- | --- | --- | --- | --- | --- | --- | --- | --- |

**Table S2.** Crystallographic parameters for Eu*x*Co4Sb12 prepared under high-pressure conditions,refined from SXRD data at 673 K.

| | *Crystal data* | | --- | | [Cubic](Eu05Co4Sb12_30C%20_symmetry_cell_setting), | | SXRD, λ= 0.45861 Å | | *a* = [9.069007(19)](Eu05Co4Sb12_30C%20_cell_length_a) Å | | *V* = [745.90(1)](Eu05Co4Sb12_30C%20_cell_volume) Å3 | | *Z* = [2](Eu05Co4Sb12_30C%20_cell_formula_units_Z) | |  |  | *Refinement* | | --- | | *R*p = [10.75%](Eu05Co4Sb12_30C%20_pd_proc_ls_prof_R_factor) | | *R*wp = [19.30%](Eu05Co4Sb12_30C%20_pd_proc_ls_prof_wR_factor) | | *R*exp = [5.57%](Eu05Co4Sb12_30C%20_pd_proc_ls_prof_wR_expected) | | *R*Bragg = [2.40%](Eu05Co4Sb12_30C%20_refine_ls_R_I_factor) | | χ2 = 4.95 | |  | |
| --- | --- | --- | --- | --- | --- | --- | --- | --- | --- | --- | --- | --- | --- | --- | --- | --- | --- | --- | --- | --- |

| | [*Fractional atomic coordinates and isotropic or equivalent isotropic displacement parameters (Å2)*](Eu05Co4Sb12_30C%20_atom_site_label) | | | | | | | --- | --- | --- | --- | --- | --- | |  | *x* | *y* | *z* | *U*iso*/*U*eq | Occ. (<1) | | Co | 1/4 | 1/4 | 1/4 | 0.0112(4) |  | | Sb | 0 | 0.33469(6) | 0.15792(7) | 0.0141(4) | 0.985(4) | | Eu | 0.24(3) | 0 | 0 | 0.03800* | 0.0024(12) |  | [*Atomic displacement parameters (Å2)*](Eu05Co4Sb12_30C%20_atom_site_aniso_label) | | | | | | | | --- | --- | --- | --- | --- | --- | --- | |  | *U*11 | *U*22 | *U*33 | *U*12 | *U*13 | *U*23 | | Co | 0.0112(4) | 0.0112(4) | 0.0112(4) | 0.0012(5) | 0.0012(5) | 0.0012(5) | | Sb | 0.0111(3) | 0.0175(4) | 0.0138(4) | 0.00000 | 0.00000 | 0.0015(3) | |
| --- | --- | --- | --- | --- | --- | --- | --- | --- | --- | --- | --- | --- | --- | --- | --- | --- | --- | --- | --- | --- | --- | --- | --- | --- | --- | --- | --- | --- | --- | --- | --- | --- | --- | --- | --- | --- | --- | --- | --- | --- | --- | --- | --- | --- | --- | --- | --- | --- | --- | --- | --- | --- | --- | --- | --- | --- | --- | --- |

**Table S3.** Crystallographic parameters for Eu*x*Co4Sb12 prepared under high-pressure conditions,refined from SXRD data at 873 K*.*

| | *Crystal data* | | --- | | [Cubic](Eu05Co4Sb12_30C%20_symmetry_cell_setting), | | SXRD, λ= 0.45861 Å | | *a* = [9.08701(2)](Eu05Co4Sb12_30C%20_cell_length_a) Å | | *V* = [750.35(1)](Eu05Co4Sb12_30C%20_cell_volume) Å3 | | *Z* = [2](Eu05Co4Sb12_30C%20_cell_formula_units_Z) | |  |  | *Refinement* | | --- | | *R*p = [13.44%](Eu05Co4Sb12_30C%20_pd_proc_ls_prof_R_factor) | | *R*wp = [24.57%](Eu05Co4Sb12_30C%20_pd_proc_ls_prof_wR_factor) | | *R*exp = [5.59%](Eu05Co4Sb12_30C%20_pd_proc_ls_prof_wR_expected) | | *R*Bragg = [3.14%](Eu05Co4Sb12_30C%20_refine_ls_R_I_factor) | | χ2 = 5.76 | |  | |
| --- | --- | --- | --- | --- | --- | --- | --- | --- | --- | --- | --- | --- | --- | --- | --- | --- | --- | --- | --- | --- |

| | [*Fractional atomic coordinates and isotropic or equivalent isotropic displacement parameters (Å2)*](Eu05Co4Sb12_30C%20_atom_site_label) | | | | | | | --- | --- | --- | --- | --- | --- | |  | *x* | *y* | *z* | *U*iso*/*U*eq | Occ. (<1) | | Co | 1/4 | 1/4 | 1/4 | 0.0140(5) |  | | Sb | 0 | 0.33445(8) | 0.15792(8) | 0.0187(5) | 0.985(4) | | Eu | 0.24000 | 0 | 0 | 0.03800* | -0.0014(14) |  | [*Atomic displacement parameters (Å2)*](Eu05Co4Sb12_30C%20_atom_site_aniso_label) | | | | | | | | --- | --- | --- | --- | --- | --- | --- | |  | *U*11 | *U*22 | *U*33 | *U*12 | *U*13 | *U*23 | | Co | 0.0140(5) | 0.0140(5) | 0.0140(5) | 0.0009(6) | 0.0009(6) | 0.0009(6) | | Sb | 0.0146(4) | 0.0236(5) | 0.0180(5) | 0.00000 | 0.00000 | 0.0023(3) | |
| --- | --- | --- | --- | --- | --- | --- | --- | --- | --- | --- | --- | --- | --- | --- | --- | --- | --- | --- | --- | --- | --- | --- | --- | --- | --- | --- | --- | --- | --- | --- | --- | --- | --- | --- | --- | --- | --- | --- | --- | --- | --- | --- | --- | --- | --- | --- | --- | --- | --- | --- | --- | --- | --- | --- | --- | --- | --- | --- |

**Figure S1*.*** Two Fourier difference plots for z= 0, a) before and b) after the introduction of Eu at 12*d* positions

**Figure S2*.*** Observed (red crosses), calculated profile (black line), difference (blue line) and Bragg reflections (green symbols) SXRD pattern for Eu*x*Co4Sb12 at **(a)** 473 K and **(b)** 673 K. The insets show the quality of the fits in the high-angle region.

**Figure S3.** Additional SEM micrographs of the as-grown pellets of Eu0.02(1)Co4Sb12. **(a)** x6000 and **(b)** x8000 magnification.


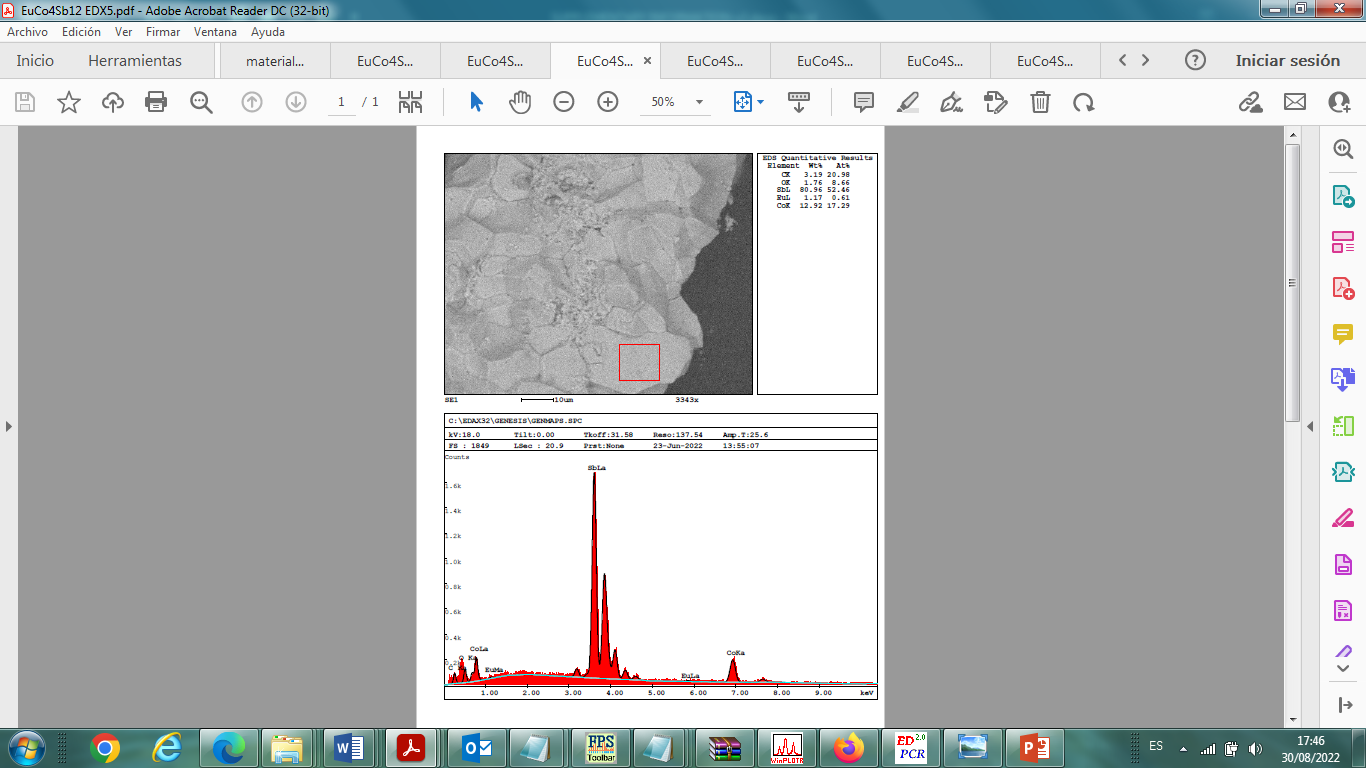


**Figure S4.** Upper panel: SEM image where the EDX spectrum was collected, and relative contents of Sb, Co, and Eu. Lower panel: typical EDX spectrum.





**Figure S5.** Thermoelectric figure of merit as a function of temperature for the Eu0.5Co4Sb12 compound, and La0.5Co4Sb12 synthesized under high-pressure. Both compositions refer to their nominal chemical formula.
